# Supplementary material for: The dehydration mechanism of Na and K birnessites: a comprehensive multitechnique study
Source: Royal Society of Chemistry journal article supplement (doi:10.1039/d4dt00588k), 2024-01-01
Supplement: d4dt00588k1.pdf [file d4dt00588k1.pdf]

## Supporting information of Dehydration Mechanism of Na and K birnessites: A Comprehensive Multitechnique Study

E. André,<sup>1,\*</sup> D. Cornu,<sup>1,\*</sup> L. Pérez Ramirez,<sup>2,3</sup> P. Durand,<sup>4</sup> J.-J. Gallet,<sup>2,3</sup> F. Bournel,<sup>2,3</sup> F. Rochet,<sup>2,3</sup> C. Ruby,<sup>1</sup> C. Carteret,<sup>1</sup> R. Coustel<sup>1,\*</sup>

*1 - Université de Lorraine, CNRS, LCPME, F-54000 Nancy, France*

*2 - Sorbonne Université, CNRS (UMR 7614), Laboratoire de Chimie Physique Matière et Rayonnement, 75252 Paris Cedex 05, France*

*3 - Synchrotron SOLEIL, L'Orme des Merisiers, F-91192 Gif-sur-Yvette, France*

*4 - Université de Lorraine, CNRS, CRM2, F-54000 Nancy, France*

### Vibrational spectroscopies and DFT

DRIFT spectra were collected with a Thermo Nicolet 8700 spectrometer, equipped with a KBr beamsplitter, an MCT detector and using an environmental cell with a Harrick Praying Mantis, with a 4 cm<sup>-1</sup> resolution. Measurements were performed on pure Na-bir and K-bir powders in ambient condition (air at RT) as well as under vacuum (down to 10<sup>-5</sup> mbar) at temperature up to 200°C. Each spectrum is the average of 40 scans. Measurements were also performed at RT under a humid atmosphere (1 bar). Humid atmosphere with controlled RH was generated using an in-house dynamic system mixing a dry and a wet N<sub>2</sub> flow controlled using a mass flow meter. Using such a setup, an RH up to 100% can be generated with an uncertainty of 0.3–0.5%.

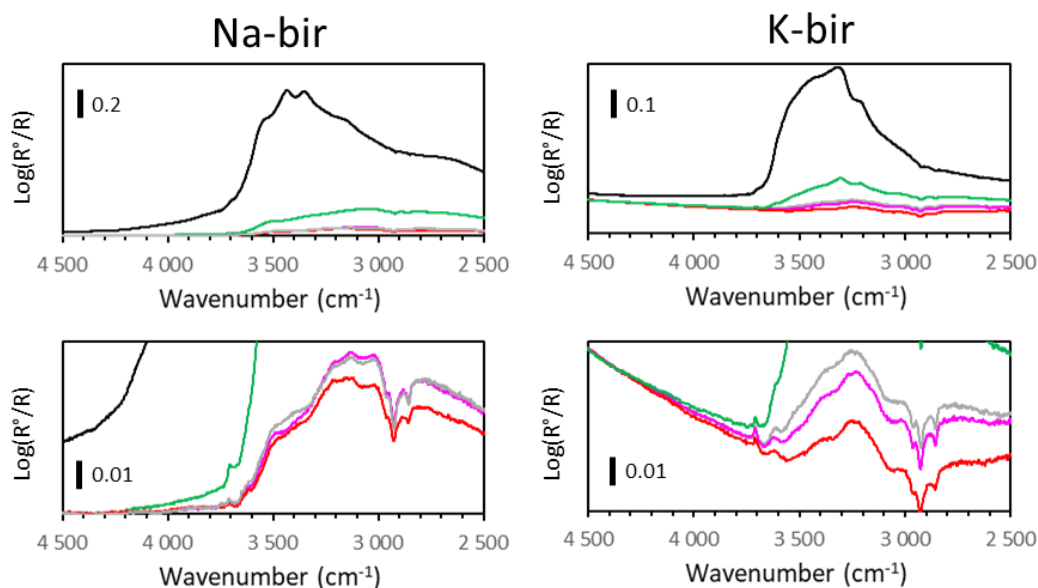

Figure S1: DRIFT spectra of Na-bir (left) and K-bir (right) under air (black) and 10<sup>-5</sup> mbar (grey) at RT (spectra recorded during vacuuming are shown (green)). Pink and red: spectra recorded under 10<sup>-5</sup> mbar at 100°C and 200°C, respectively. Signal in the 2800-3000 cm<sup>-1</sup> range mainly arises from improperly compensated carbonaceous compounds.

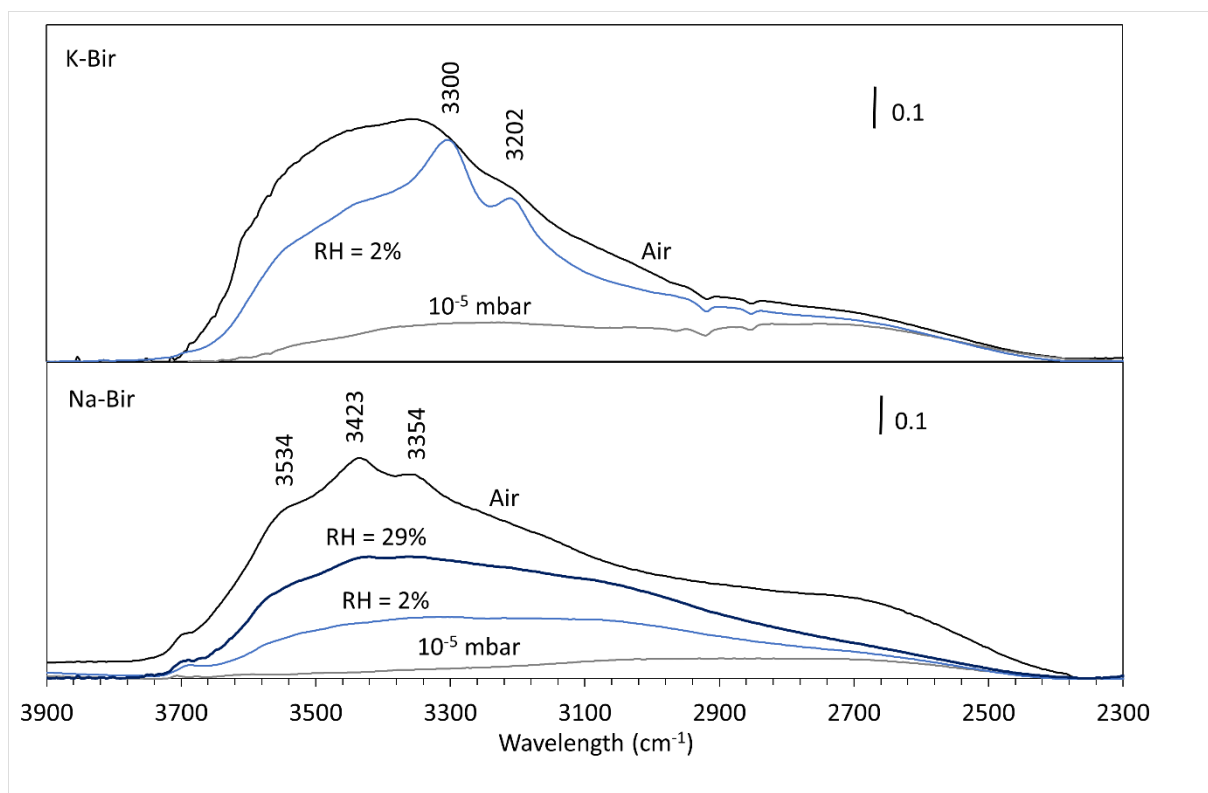

Figure S2: DRIFT spectra of Na-bir (bottom) and K-bir (top) under air (black), 10<sup>-5</sup> mbar (red), 2% (light blue), and 29% (dark blue) RH in N<sub>2</sub> at RT.

### Raman spectroscopy

Raman spectra were recorded on a Renishaw inVia Qontor microspectrometer equipped with a confocal microscope and an Olympus X50 objective (N.A = 0.55). A 532 nm exciting radiation was used with a laser power below 0.05 mW for all samples to prevent their degradation. The spot area was a few  $\mu\text{m}^2$ . Several locations were probed on each sample. The spectral resolution was about 4 cm<sup>-1</sup> and the precision on the wavenumber was lower than 1 cm<sup>-1</sup>.

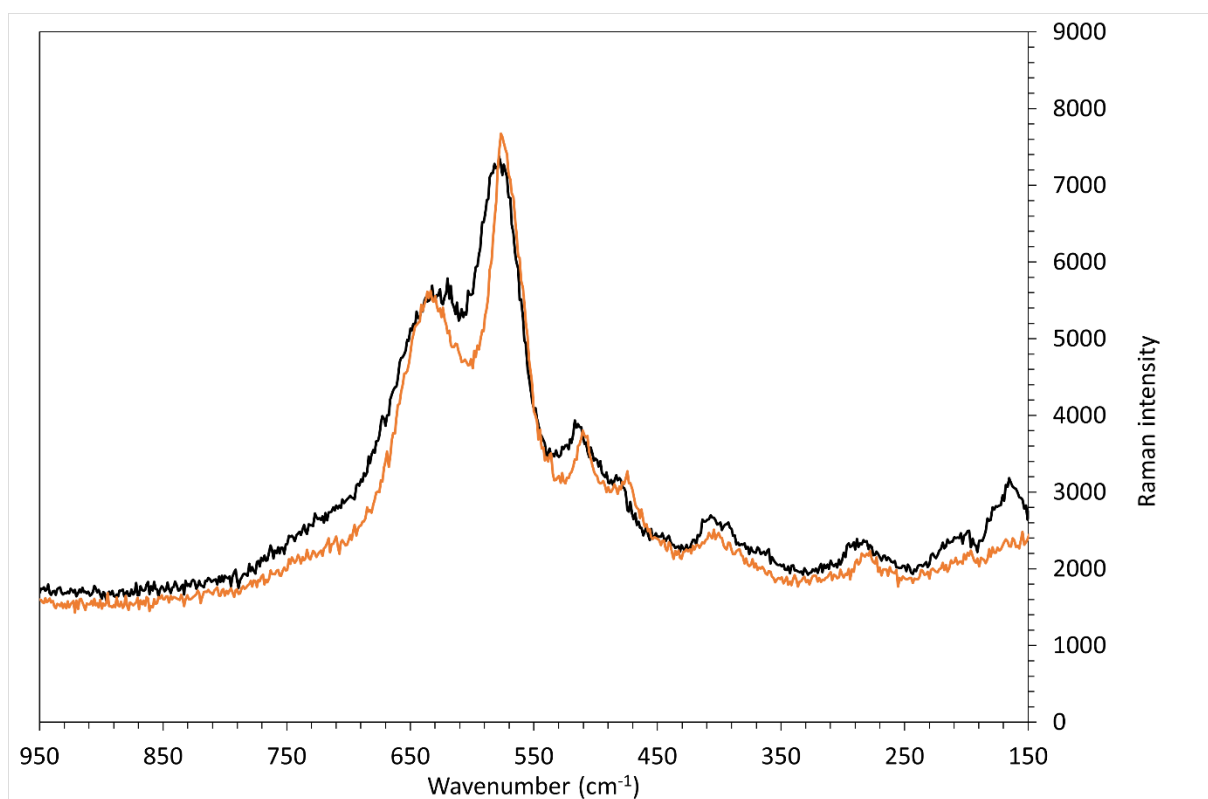

Figure S3: Raman spectra of Na-bir (black) and K-bir (orange) under air at RT.

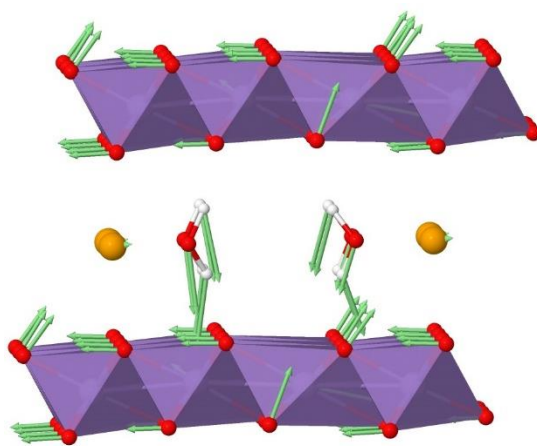

Figure S4: Scheme indicating the calculated direction of the displacement of the atoms during the vibration at  $292\text{ cm}^{-1}$  in Na-bir.

## NAP-XPS

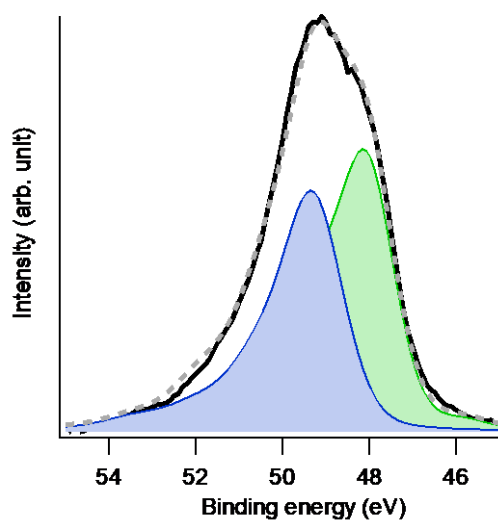

Figure S5: Mn 3p XPS spectra of Na-bir ( $h\nu = 420$  eV) at  $RH = 0.0$  (black; 293 K, UHV). The spectrum obtained from deconvolution (grey dash line) and its components (Mn(III): green, Mn(IV): blue) are shown. Deconvolution procedure was given in ref<sup>1</sup>.

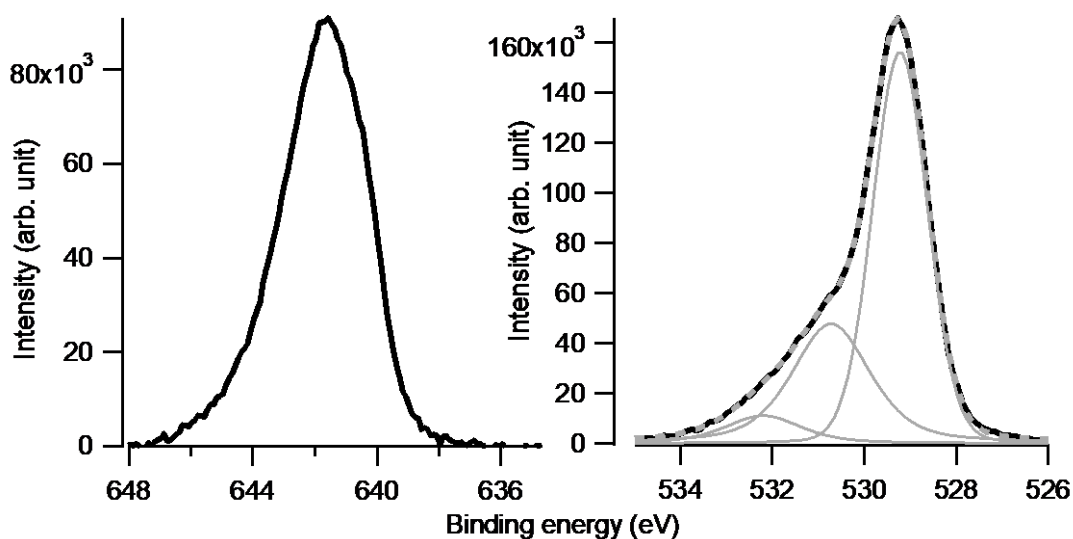

Figure S6: Mn  $2p_{3/2}$  (left) and O 1s (right) XPS spectra of Na-bir ( $h\nu = 1100$  eV) at  $RH = 0.0$  (black; 293 K, UHV).

The O 1s spectrum of Na-bir obtained under UHV is presented in Figure S6. Curve fitting was carried out with sums of Gaussian functions. The most intense component of the O 1s spectrum at 529.2 eV is attributed to the  $O^{2-}$  ions of the lattice. Components at higher binding energies (530.7 and 532.2 eV) are assigned to partial hydroxylation of the oxide layers.<sup>1</sup>

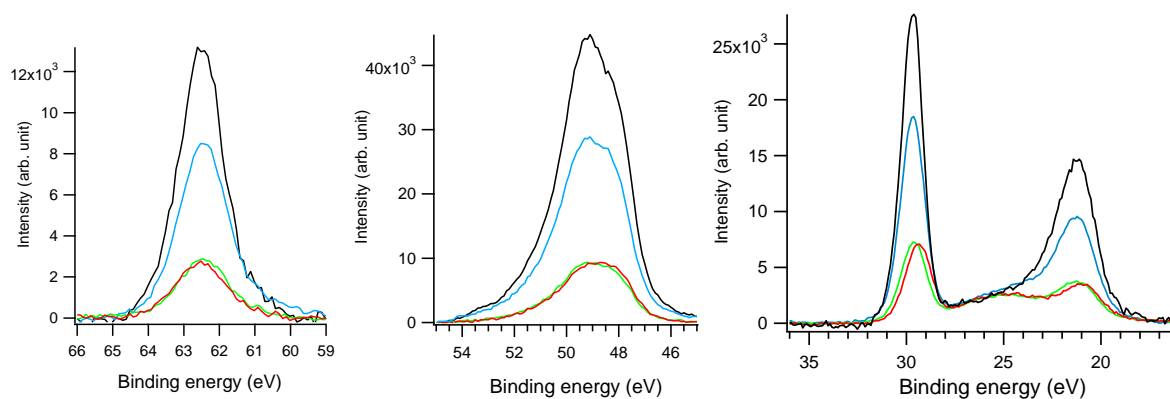

Figure S7: Na 2s (left), Mn 3p (middle) and Na 2p & O 2s (right) XPS spectra of Na-bir ( $h\nu = 420$  eV).  $RH = 0.0$  (black; 293 K, UHV),  $RH = 0.4$  % (blue; 293 K, 0.1 mbar water),  $RH = 9$  % (green; 293 K, 2 mbar water),  $RH = 31$  % (red; 274 K, 2 mbar water).

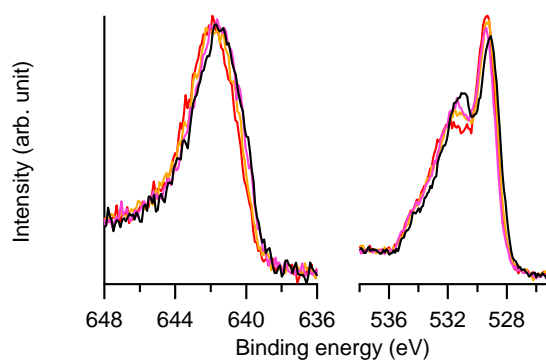

Figure S8: Mn  $2p_{3/2}$  (left) and O 1s (right) XPS spectra of Na-bir ( $h\nu = 1100$  eV) at  $RH = 9$  % (293 K, 2 mbar water). Four spectra (red, yellow, pink and black) were recorded successively on the same spot under irradiation.

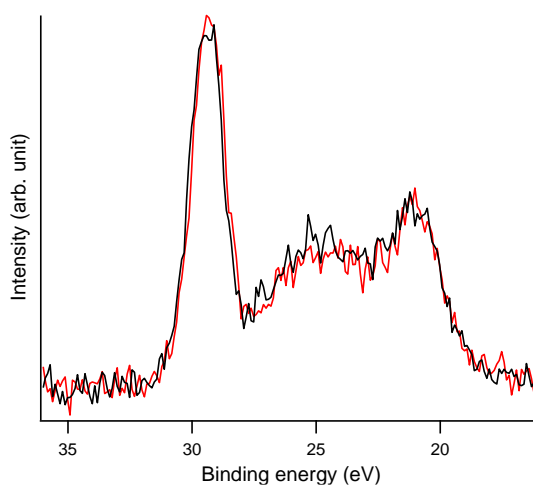

Figure S9: Na 2p and O 2s (1<sup>st</sup> scan: red, 9<sup>th</sup> scan: black) NAP-XPS spectra of Na-bir ( $h\nu = 420$  eV) at  $RH = 31$  % (274 K, 2 mbar water). Spectra were recorded successively on the same spot under irradiation.

Prolonged irradiation ( $h\nu = 1100$  eV) of hydrated Na-bir leads to Mn reduction (Mn 2p feature shifts to lower binding energy) and material hydroxylation (decrease and increase of  $O^{2-}$  and OH components, respectively, of the O 1s spectrum, see Figure S8). This material alteration should be attributed to water radiolysis effects as previously evidenced on different hydrated clays.<sup>2–4</sup> To avoid material alteration, irradiation time was limited: each NAP-XPS spectrum was acquired on different spot. For a given spectrum, different recorded scans were compared to exclude any birnessite evolution under the X-ray beam (see, for example, Figure S9). Therefore, the modification of the Na 2p spectrum at  $RH = 31\%$  with respect to what is observed at lower  $RH$ , cannot be attributed to radiolysis effects (see Figure 7).

## References

- 1 H. Boumaiza, A. Renard, M. Rakotomalala Robinson, G. Kervern, L. Vidal, C. Ruby, L. Bergaoui and R. Coustel, *Journal of Solid State Chemistry*, 2019, **272**, 234–243.
- 2 R. Coustel, A. Boucly, E. André, A. Di Bitetto, F. Bournel, J.-J. Gallet, F. Rochet and C. Carteret, *J. Phys. Chem. C*, 2023, **127**, 4144–4153.
- 3 A. Boucly, F. Rochet, Q. Arnoux, J.-J. Gallet, F. Bournel, H. Tissot, V. Marry, E. Dubois and L. Michot, *Sci Rep*, 2018, **8**, 6164.
- 4 H. Tissot, R. Coustel, F. Rochet, A. Boucly, C. Carteret, E. André, F. Bournel and J.-J. Gallet, *J. Phys. Chem. C*, 2023, **127**, 15825–15838.
